# Supplementary material
Source: PubMed Central journal article supplement (PMC7656933)
Supplement: advancesADV2020003065-suppl1.pdf [file advancesADV2020003065-suppl1.pdf]

**Table S1. Demographics, comorbidities, and symptoms in 107 iTTP episodes**

| Variables                                   | Survived (n=96) | Died (n=11)    | p-value                  |
|---------------------------------------------|-----------------|----------------|--------------------------|
| <b>Demographic</b>                          |                 |                |                          |
| Age (yrs), median (IQR)                     | 45 (33-52.8)    | 54 (48-56)     | 0.060 <sup>a</sup>       |
| Female gender, n (%)                        | 54 (56.3)       | 7 (63.6)       | 0.883                    |
| African American, n (%)                     | 80 (83.3)       | 8 (72.7)       | 0.649                    |
| Disease status (initial), n (%)             | 57 (59.4)       | 6 (54.5)       | 1.000                    |
| <b>Blood Group O</b> , n (%)                | 53 (55.2)       | 5 (45.5)       | 0.539                    |
| <b>Body mass index (BMI)</b> , median (IQR) | 32.5 (26-40.2)  | 29 (23.5-35.5) | 0.140 <sup>a</sup>       |
| <b>Comorbidities</b>                        |                 |                |                          |
| Hypertension, n (%)                         | 51 (53.1)       | 8 (80.0)       | 0.196                    |
| Diabetes mellitus, n (%)                    | 21 (21.9)       | 3 (30.0)       | 0.851                    |
| <b>SLE</b>                                  |                 |                |                          |
| Positive, n (%)                             | 13 (23.6)       | 1 (50.0)       | 0.434                    |
| Negative, n (%)                             | 42 (76.4)       | 1 (50.0)       | 0.434                    |
| ND, n (%)                                   | 41 (42.7)       | 9 (81.8)       | 0.032                    |
| <b>HIV (n = 87)</b>                         |                 |                |                          |
| Positive, n (%)                             | 9 (11.3)        | 1 (14.3)       | 1.000                    |
| Negative, n (%)                             | 71 (88.8)       | 6 (85.7)       | 1.000                    |
| ND, n (%)                                   | 16 (16.7)       | 4 (36.4)       | 0.238                    |
| <b>Symptoms/Signs</b>                       |                 |                |                          |
| CNS symptoms, n (%)                         | 53 (55.2)       | 7 (63.6)       | 0.831                    |
| Low GCS, n (%)                              | 30 (31.3)       | 7 (63.6)       | 0.071                    |
| GCS, median(IQR)                            | 15 (14-15)      | 12 (3-15)      | <b>0.003<sup>a</sup></b> |
| Renal Dysfunction, n (%)                    | 41 (42.7)       | 6 (54.5)       | 0.668                    |
| Abdominal pain, n (%)                       | 30 (31.3)       | 3 (27.3)       | 1.000                    |
| Fever, n (%)                                | 14 (14.6)       | 2 (18.2)       | 1.000                    |
| Chest pain, n (%)                           | 13 (13.5)       | 0 (0.0)        | 0.415                    |
| <b>Social history (n = 104)</b>             |                 |                |                          |
| Smoking, n (%)                              | 53 (55.8)       | 7 (77.8)       | 0.356                    |
| Drinking, n (%)                             | 40 (42.1)       | 5 (55.6)       | 0.670                    |
| Illicit drug use, n (%)                     | 21 (22.1)       | 1 (11.1)       | 0.730                    |

IQR, interquartile range; n, the number of subjects or episodes; ND, not determined or available; SLE, systemic lupus erythematosus; HIV, human immunodeficiency viruses; CNS, central nerve system; GCS, Glasgow Coma Score; <sup>a</sup>Mann-Whitney U was used to determine the statistical significance, while the Chi-square test was used for all other comparison between two groups. p<0.05 is considered to be statistically significant.

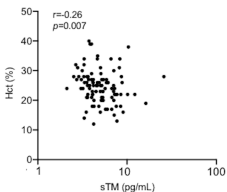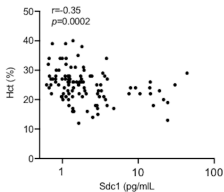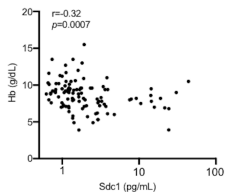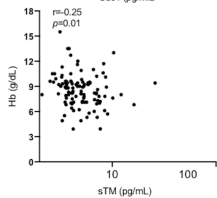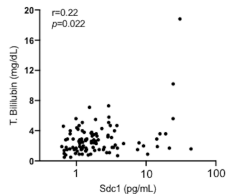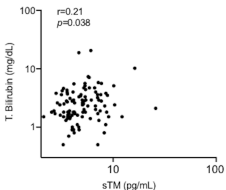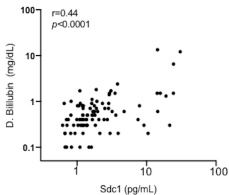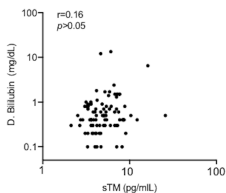

**Figure S1. Correlations between Sdc-1 or sTM and routine laboratory parameters.** Spearman correlation coefficient ( $r$ ) was determined using Prism 8 software. P values less than 0.05 and 0.001 are considered statistically significant and highly significant, respectively.
